# Supplementary material
Source: Springer Nature journal article supplement (https://www.springermedizin.de/resource/supplementary/12889_2008_1073_MOESM1_ESM.pdf/9502394)
Supplement: MOESM1 [file 9502394]

**Eligible Births (n = )**  
Contacted at \_\_ week first-time parent group meeting across 12  
Victorian Local Government Areas

**First-time parent group expressed interest to research team  
(n = )**

**Enrolment**  
(Consent form returned)  
(n = \_ families, n = \_ first-time parent groups)

**Excluded (n = )**  
Not meeting inclusion criteria (n= )  
Refused to participate (n= )  
Other reasons (n= )

**Randomisation**

**Allocated to intervention**  
(n= )  
Received allocated intervention at \_ time  
point (n= )  
Did not receive allocated intervention at \_  
time point (n= )  
Give reasons

**Allocation**

**Allocated to Control**  
(n= )  
Received 'usual care' at \_ time point (n= )  
Did not receive 'usual care' at \_ time point  
(n= )  
Give Reasons

**Follow-up**  
Returned questionnaire at \_ scheduled time  
point (n= )  
Lost to follow up (n= )  
Give reasons  
Discontinued intervention (n= )  
Give reasons

**Follow-Up**

**Follow-up**  
Returned questionnaire at \_ scheduled time  
point (n= )  
Lost to follow up (n= )  
Give reasons  
Discontinued control (n= )  
Give reasons

**Analyzed (n= )**  
Excluded from analysis (n= )  
Give reasons

**Analysis**

**Analyzed (n= )**  
Excluded from analysis (n= )  
Give reasons
